# Supplementary material for: Active Surveillance for Highly Pathogenic Avian Influenza Viruses in Wintering Waterbirds in Northeast Italy, 2020–2021
Source: MDPI journal article supplement (doi:10.3390/microorganisms9112188), 2021-10-20
Supplement: s1 [file s1]

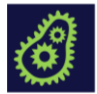

Table S1. H5 HPAI viruses analysed for phylogenetic analysis, viral sequences were submitted to GISAID EpiFlu Database

| Virus                                                | H5 HPAI<br>Subtype clade<br>2.3.4.4b | Data<br>collection | Region | Province | Location                | Accession Number          |
|------------------------------------------------------|--------------------------------------|--------------------|--------|----------|-------------------------|---------------------------|
| A/Eurasian_wigeon/Italy/20VIR7139-121/2020           | H5N8                                 | 2020-11-14         | Veneto | Rovigo   | Valle Ca' Zuliani       | EPI1815147-<br>EPI1815154 |
| A/mallard/Italy/20VIR7139-124_feather/2020           | H5N8                                 | 2020-11-14         | Veneto | Rovigo   | Valle Ca' Zuliani       | EPI1815156-EPI1815163     |
| A/mallard/Italy/20VIR7139-73/2020                    | H5N8                                 | 2020-11-14         | Veneto | Rovigo   | Valle Ca' Zuliani       | EPI1814603-<br>EPI1814610 |
| A/common_buzzard/Italy/21VIR431-7/2020               | H5N8                                 | 2020-11-17         | Puglia | Lecce    | Lecce                   | EPI1858349-EPI1858356     |
| A/Eurasian_wigeon/Italy/20VIR7301-362/2020           | H5N8                                 | 2020-11-21         | Veneto | Venezia  | Valle Drago -<br>Jesolo | EPI1843643-<br>EPI1843650 |
| A/Eurasian_wigeon/Italy/20VIR7301-206/2020           | H5N1                                 | 2020-11-21         | Veneto | Venezia  | Valle Drago -<br>Jesolo | EPI1815139-EPI1815146     |
| A/Eurasian_wigeon/Italy/20VIR7301-31/2020            | H5N8                                 | 2020-11-21         | Veneto | Venezia  | Valle Drago -<br>Jesolo | EPI1815378-EPI1815385     |
| A/Eurasian_wigeon/Italy/20VIR7301-34/2020            | H5N8                                 | 2020-11-21         | Veneto | Venezia  | Valle Drago -<br>Jesolo | EPI1815371-EPI1815377     |
| A/greater_white-fronted_goose/Italy/20VIR8073-4/2020 | H5N1                                 | 2020-11-23         | FVG    | Gorizia  | Monfalcone              | EPI1843635-<br>EPI1843642 |
| A/common_teal/Italy/20VIR7439-191/2020               | H5N8                                 | 2020-11-28         | Veneto | Rovigo   | Valle Chiusa            | EPI1858205-<br>EPI1858212 |
| A/common_teal/Italy/20VIR7439-190/2020               | H5N5                                 | 2020-11-28         | Veneto | Rovigo   | Valle Chiusa            | EPI1843619-<br>EPI1843626 |

| Tab.S1 (cont.)                                      |      |            |                   |           |                               |                           |
|-----------------------------------------------------|------|------------|-------------------|-----------|-------------------------------|---------------------------|
| A/greylag_goose/Italy/20VIR7660-6/2020              | H5N8 | 2020-11-29 | Veneto            | Venezia   | Jesolo                        | EPI1843627-<br>EPI1843634 |
| <b>A/common_teal/Italy/20VIR7608-73/2020</b>        | H5N8 | 2020-12-04 | Veneto            | Venezia   | Valle Figheri                 | EPI1843611-<br>EPI1843618 |
| A/ornamental_grey_crowned_crane/Italy/21VIR436/2021 | H5N8 | 2021-01-19 | Emilia<br>Romagna | Ravenna   | Lugo                          | na                        |
| A/seagull/Italy/21VIR2479/2021                      | H5N8 | 2021-01-28 | Emilia<br>Romagna | Rimini    | Spiaggia Viserba              | EPI1860048-<br>EPI1860055 |
| A/chicken/Italy/21VIR1151-2/2021                    | H5N8 | 2021-02-17 | FVG               | Pordenone | Chions                        | EPI1858173-<br>EPI1858180 |
| A/duck/Italy/21VIR1293-15/2021                      | H5N8 | 2021-02-23 | Veneto            | Padova    | San Giorgio delle<br>Pertiche | EPI1858213-<br>EPI1858220 |
| A/guinea_fowl/Italy/21VIR1293-20/2021               | H5N8 | 2021-02-23 | Veneto            | Padova    | San Giorgio delle<br>Pertiche | EPI1858229-<br>EPI1858236 |
| A/chicken/Italy/21VIR1293-9/2021                    | H5N8 | 2021-02-23 | Veneto            | Padova    | San Giorgio delle<br>Pertiche | EPI1858181-<br>EPI1858188 |

**bold** viral strains isolated in migratory birds during active surveillance activities

3  
4  
5  
6  
7  
8  
9  
10  
11  
12  
13  
14  
15
